# Supplementary material
Source: PubMed Central journal article supplement (PMC8825465)
Supplement: kiab551_supplementary_data.pdf [file kiab551_supplementary_data.pdf]

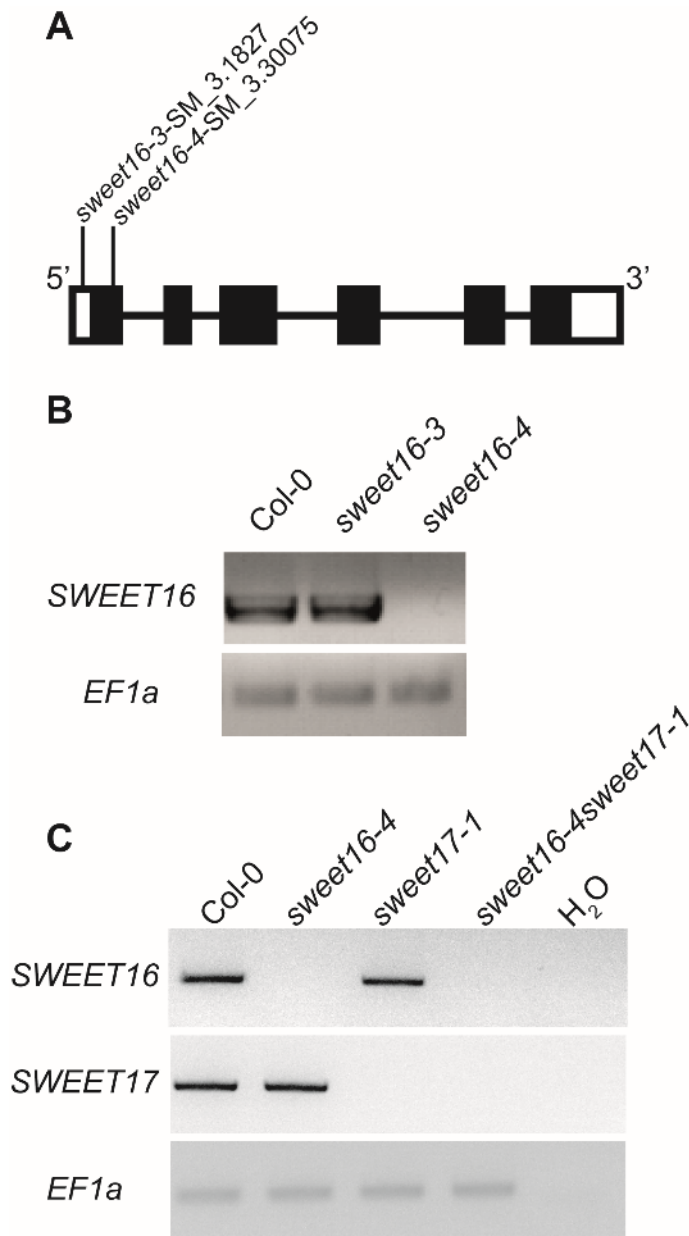

**Supplemental Figure S1. Identification of *SWEET16* insertion lines and characterization of the *sweet16-4:sweet17-1* mutant line.**

(A) The position of the T-DNA insertions in *SWEET16*. White boxes represent the UTR sequences, the black boxes are the exon sequences and the black lines between the black boxes are the intron sequences.

(B) RT-PCR analysis of *SWEET16* expression in the single mutant lines *sweet16-3* and *sweet16-4*. Total RNA was isolated from 10-day-old *in vitro* seedlings and the resulting cDNA were used for amplification with primers designed between the start and stop codon of the

*SWEET16* sequence (for primers sequence see Supplemental Table S4). Expression of EF1 $\alpha$  was used as a loading control.

(C) RT-PCR analysis of *SWEET16* and *SWEET17* expression in the floral stem of the *sweet16-4sweet17-1* mutant line. Total RNA was isolated from 7-week-old floral stem of plants grown in long-day conditions. After reverse transcription, the cDNAs were used for amplification with primers designed between the start and stop codon of the *SWEET16* and/or *SWEET17* sequences (for primers sequences see Supplemental Table 4). Expression of EF1 $\alpha$  was used as a loading control.

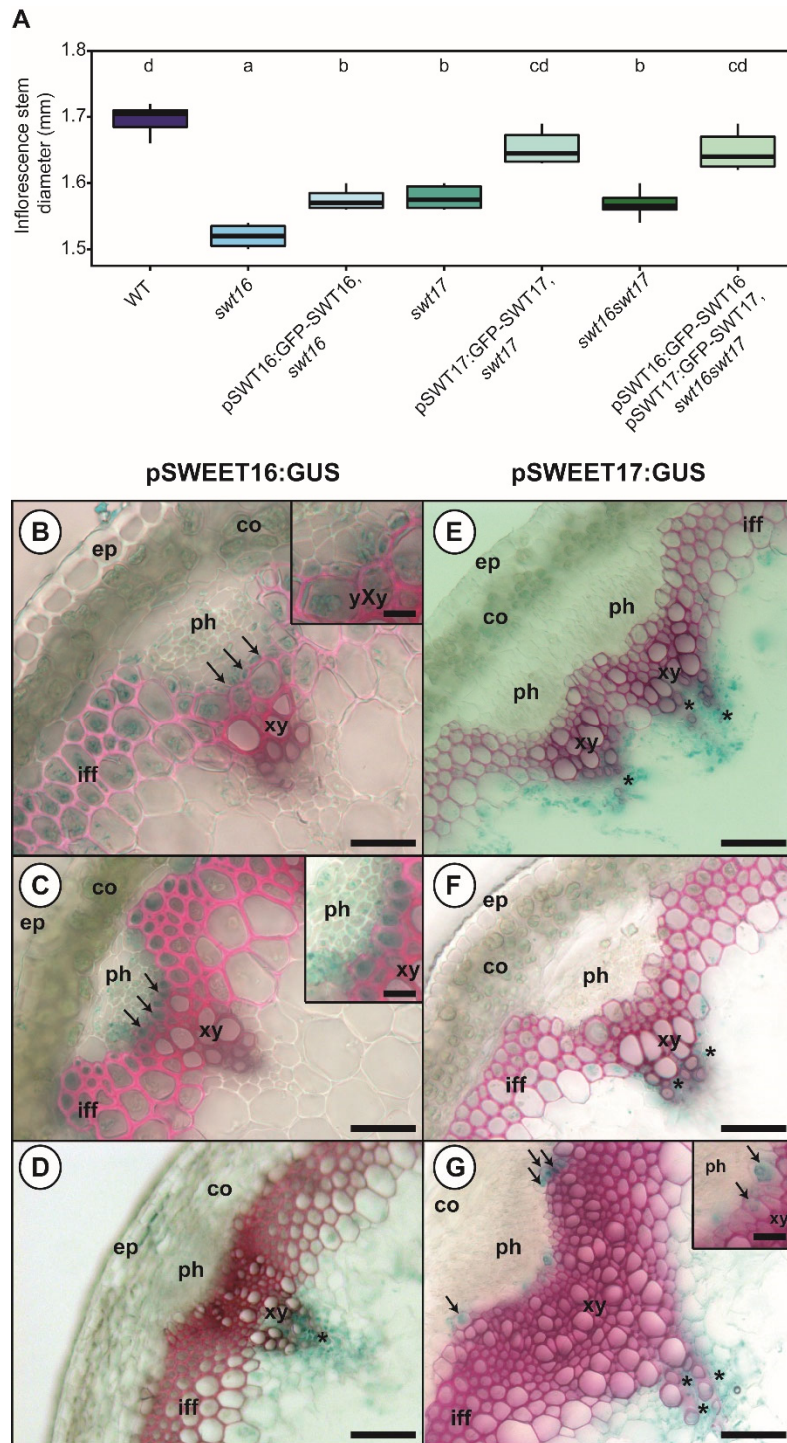

**Supplemental Figure S2. Phenotypic complementation of the *swt* mutant lines.**

(A) The diameter has been measured by a digital caliper at the bottom of the main inflorescence stem on plants grown for 7 weeks in long-day conditions. The lines represent median values, the tops and bottoms of the boxes represent the first and third quartiles, respectively, and the ends of the whiskers represent maximum and minimum data points. Values represent means from six biological replicates. A one-way analysis of variance combined with the Tukey's

comparison post-test have been performed. The values marked with the same letter were not significantly different from each other, whereas different letters indicate significant differences ( $P < 0.05$ ).

(B to D) *pSWEET16:GUS* expression pattern in sections taken at different positions in the inflorescence stem of 8-week-old plants. (E to G) *pSWEET17:GUS* expression pattern in sections taken at different positions in the inflorescence stem section of 8-week-old plants. Sections were taken in a stem region where growth was still rapid (B, E and inset), in a stem region where elongation growth had finished but where thickening of the secondary cell wall was still ongoing (C, F and inset), and at the bottom of the stem, a region that corresponds to a mature stem (D, G and inset). Arrows point to cells showing blue GUS staining and asterisks indicate xylary parenchyma cells. Lignin is colored pink after phloroglucinol staining. The intensity of the pink color indicates the level of lignification of the xylary vessels. ep: epidermis; co: cortex; iff: interfascicular fibers; ph: phloem; xy: xylem. Scale bar = 50  $\mu\text{m}$  (B-G) or 25  $\mu\text{m}$  (insets in B, C and G).

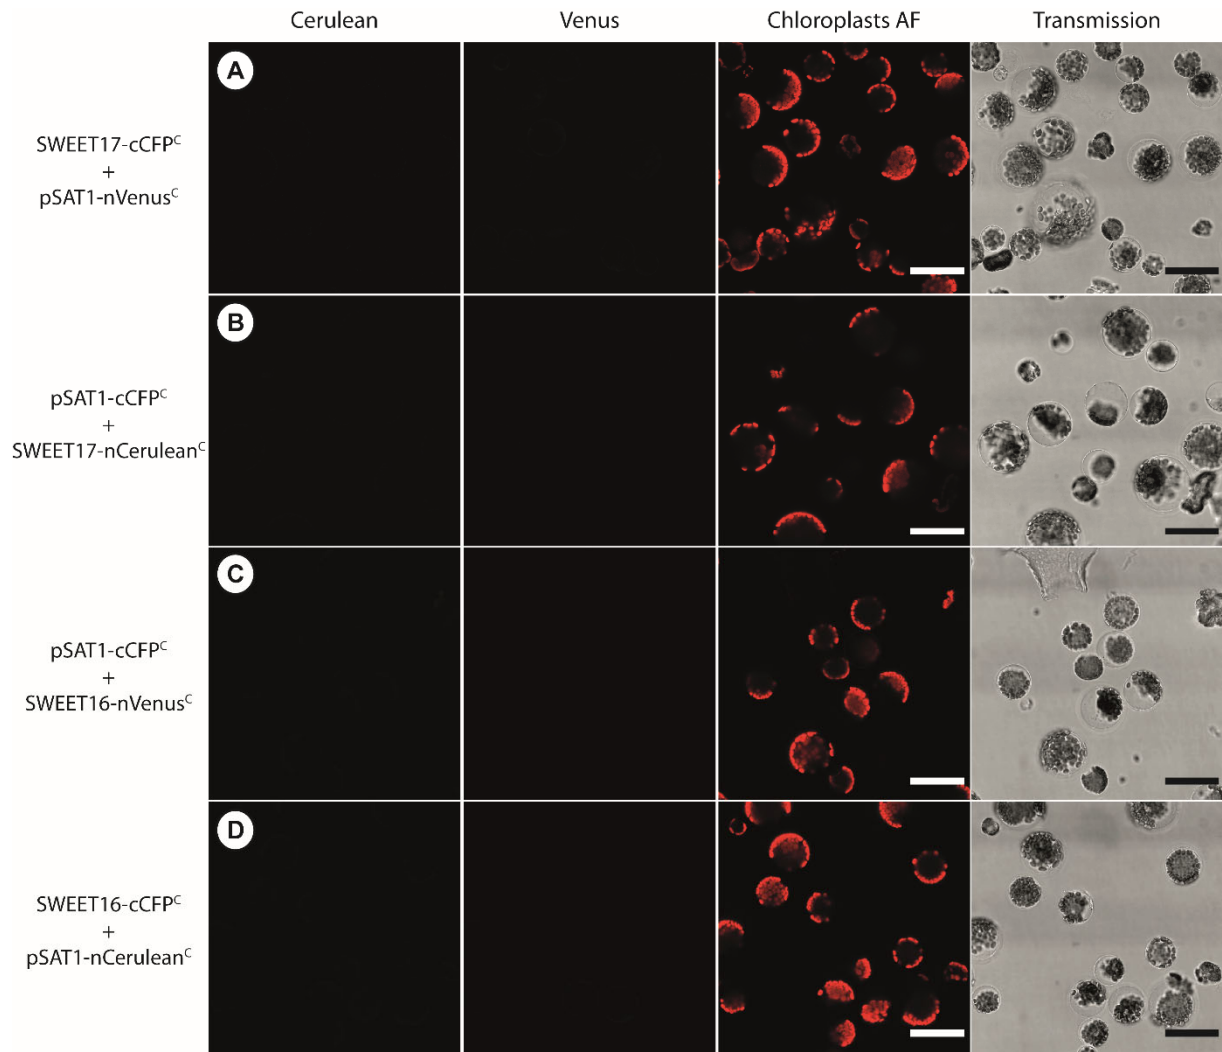

**Supplemental Figure S3. Negative controls for BIFC experiment.**

Arabidopsis mesophyll protoplasts expressing SWEET17-cCFP<sup>C</sup> and pSAT1-nVenus<sup>C</sup> (A), pSAT1-cCFP<sup>C</sup> and SWEET17-nCerulean<sup>C</sup> (B), pSAT1-cCFP<sup>C</sup> and SWEET16-nVenus<sup>C</sup> (C) and SWEET16-cCFP<sup>C</sup> and pSAT1-nCerulean<sup>C</sup> (D). No yellow (A and C) or cyan (B and D) fluorescence is reconstituted in the absence of one of the proteins. Chloroplasts autofluorescence is in false color red. The last picture of each row represents the bright field image. Scale bar = 50  $\mu$ m.

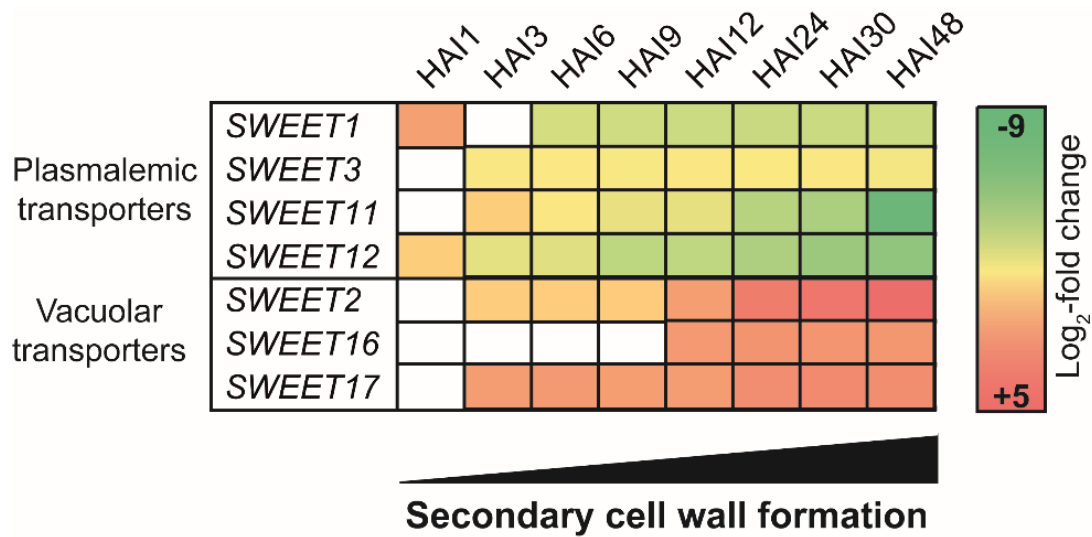

**Supplemental Figure S4. Differential expression of *SWEET* genes during the secondary cell wall formation of the xylem vessels.**

Changes in transcript levels are extracted from RNA-seq analysis performed in Li et al. (2016) and presented as log<sub>2</sub>-fold changes in comparison with the control (DMSO-treated of the DEX-inducible VND7 line) in colored boxes. HAI1-48 refer to the number of Hours After DEX Induction. White squares indicate that the gene was not differentially expressed at this time point.

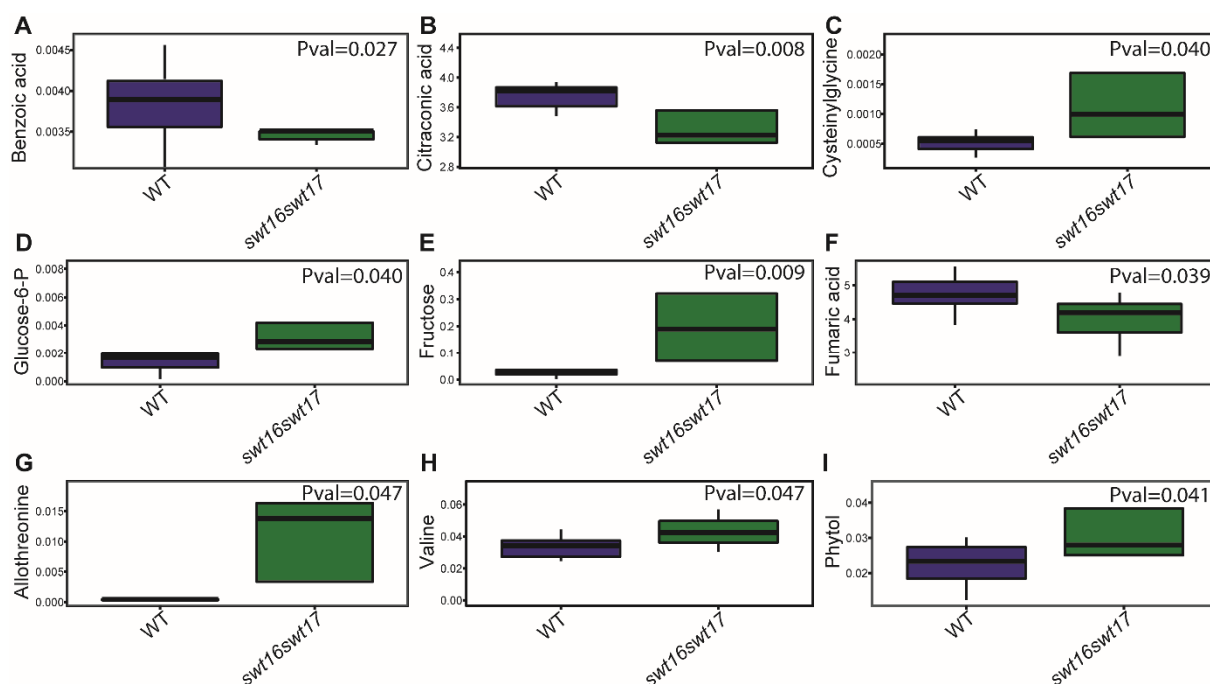

**Supplemental Figure S5. Nine out of 158 metabolites identified by GC-MS differ significantly between the wild type and the *swt16swt17* double mutant.**

Boxplots showing the relative quantity of benzoic acid (A), citraconic acid (B), cyteinyglycine (C), glucose-6-phosphate (D), fructose (E), fumaric acid (F), allothreonine (G), valine (H) and phytol (I) in the inflorescence stem of the wild type and the *swt16swt17* mutant grown in long-day conditions for seven weeks. The box-and-whisker plots represents values from 8 individual plants for each genotype. The lines represent median values, the tops and bottoms of the boxes represent the first and third quartiles, respectively, and the ends of the whiskers represent maximum and minimum data points. *P* values of the Student's *t*-test are presented directly on the graphs as well as in Supplemental Table S3.

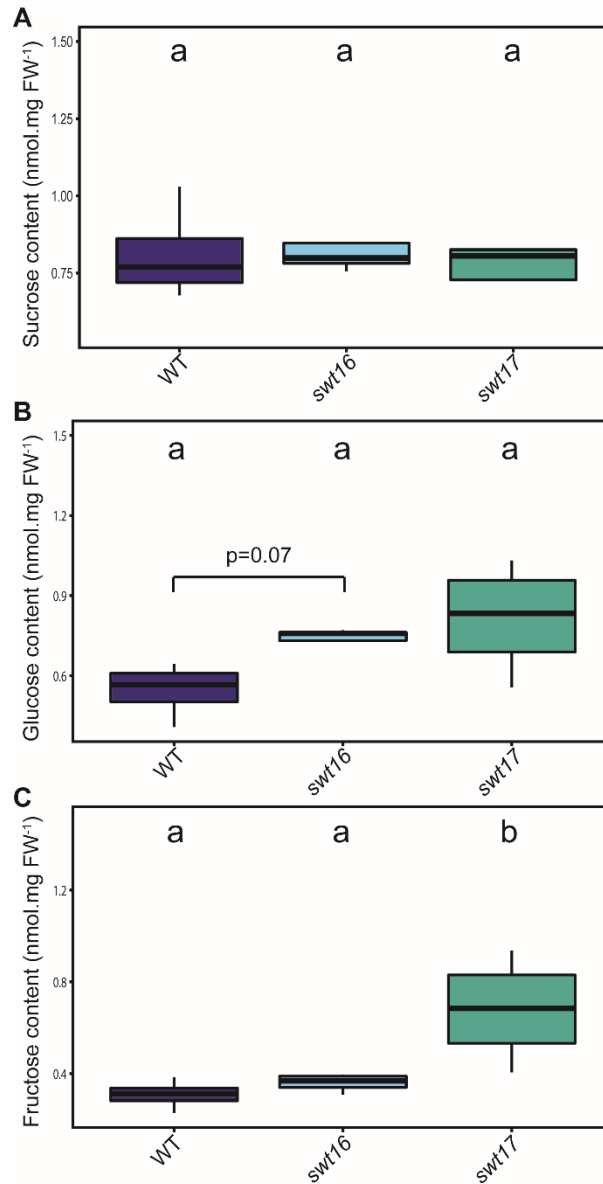

**Supplemental Figure S6. Fructose accumulation in the inflorescence stem of the *swt17* mutant.**

(A-C) Boxplots showing the sucrose (A), glucose (B) and fructose (C) contents in the inflorescence stems of the wild type, the *swt16* and the *swt17* mutants grown under long-day conditions for seven weeks. The box-and-whisker plots represents values from 4 biological replicates for each genotype. The lines represent median values, the tops and bottoms of the boxes represent the first and third quartiles, respectively, and the ends of the whiskers represent maximum and minimum data points. A one-way analysis of variance combined with the Tukey's comparison post-test have been performed. The values marked with the same letter were not significantly different from each other, whereas different letters indicate significant differences ( $P < 0.05$ ).



**Supplemental Table S1. *p* values from pairwise comparisons (Tukey post-hoc test) between genotypes of anatomical parameters measured in the inflorescence stem xylem tissue.**

WT: wild type, *s16*: *swt16*, *s17*: *swt17* and *s16s17*: *swt16swt17*. Values in grey boxes were significantly different at the 95% confidence level.

| Compared genotypes         | Stem height | Stem diameter | Total xylem area | Fiber area | Vessel area | Total xylem number | Fibers number | Vessels number | Ratio Vessels/fibers |
|----------------------------|-------------|---------------|------------------|------------|-------------|--------------------|---------------|----------------|----------------------|
| WT - <i>s16</i>            | 1           | 0.04          | 0.05             | 0.864      | 0.994       | <0.001             | <0.001        | 0.350          | 1                    |
| WT - <i>s17</i>            | 0.930       | 0.055         | 0.999            | 0.538      | 0.875       | 0.909              | 0.786         | 0.999          | 0.998                |
| WT - <i>s16s17</i>         | 0.999       | 0.002         | 0.036            | 1          | 0.999       | 0.031              | 0.074         | 0.026          | 0.904                |
| <i>s16</i> - <i>s17</i>    | 0.953       | 0.980         | 0.035            | 0.998      | 0.998       | <0.001             | <0.001        | 0.680          | 0.999                |
| <i>s16s17</i> - <i>s16</i> | 0.999       | 0.999         | 0.999            | 0.899      | 0.999       | 0.976              | 0.852         | 0.970          | 0.941                |
| <i>s16s17</i> - <i>s17</i> | 0.899       | 0.951         | 0.025            | 0.614      | 0.990       | 0.002              | 0.002         | 0.143          | 0.999                |

**Supplemental Table S2. Genes co-regulated during the secondary cell wall formation.**

Genes related to secondary cell wall formation and sugar transport were selected from differentially expressed genes associated with Cluster 21, as identified in Supplemental Table S7 in Li et al. (2016).

| <b>AGI</b> | <b>Name</b> | <b>Biological process</b>           |
|------------|-------------|-------------------------------------|
| AT1G43790  | TED6        | Cellulose biosynthesis/assembly     |
| AT3G16920  | CTL2        | Cellulose biosynthesis/assembly     |
| AT4G18780  | CesA8       | Cellulose biosynthesis/assembly     |
| AT5G03170  | AtFLA11     | Cellulose biosynthesis/assembly     |
| AT5G17420  | CesA7       | Cellulose biosynthesis/assembly     |
| AT5G44030  | CesA4       | Cellulose biosynthesis/assembly     |
| AT1G28470  | SND3        | Transcriptional regulation          |
| AT1G62990  | IRX11       | Transcriptional regulation          |
| AT1G63910  | MYB103      | Transcriptional regulation          |
| AT1G66230  | MYB20       | Transcriptional regulation          |
| AT2G45420  | LBD18       | Transcriptional regulation          |
| AT4G00220  | LBD30       | Transcriptional regulation          |
| AT4G12350  | MYB42       | Transcriptional regulation          |
| AT4G22680  | MYB85       | Transcriptional regulation          |
| AT4G28500  | SND2        | Transcriptional regulation          |
| AT5G12870  | MYB46       | Transcriptional regulation          |
| AT1G19300  | PARVUS      | Xylan biosynthesis                  |
| AT1G27440  | IRX10/GUT2  | Xylan biosynthesis                  |
| AT2G28110  | FRA8        | Xylan biosynthesis                  |
| AT2G37090  | IRX9        | Xylan biosynthesis                  |
| AT3G18660  | GUX1        | Xylan biosynthesis                  |
| AT3G50220  | IRX15       | Xylan biosynthesis                  |
| AT4G33330  | GUX2        | Xylan biosynthesis                  |
| AT5G46340  | RWA1        | Xylan biosynthesis                  |
| AT5G54690  | IRX8        | Xylan biosynthesis                  |
| AT5G67210  | IRX15L      | Xylan biosynthesis                  |
| AT4G15920  | SWEET17     | Fructose transport                  |
| AT3G14770  | SWEET2      | Glucose transport                   |
| AT1G08920  | ESL1        | Hexoses transport                   |
| AT1G11260  | STP1        | Hexoses/H <sup>+</sup> co-transport |
| AT5G26340  | STP13       | Hexoses/H <sup>+</sup> co-transport |
| AT2G20780  | PMT4        | Polyol/monosaccharides transport    |

**Supplemental Table S3. *p* values from *t*-test of metabolites identified from the GC-MS analysis.** Values in red boxes were significantly different at the 95% confidence level. Metabolites are organized in classes according to the Golm metabolome database (<http://gmd.mpimp-golm.mpg.de/Metabolites/List.aspx>).

| Metabolites                    | <i>p</i> value | Class                         |
|--------------------------------|----------------|-------------------------------|
| aspartic acid 1                | 0,410          | Acid (Amino)                  |
| aspartic acid 2                | 0,101          | Acid (Amino)                  |
| Beta- alanine 1                | 0,678          | Acid (Amino)                  |
| DL-3-aminoisobutyric acid 2    | 0,893          | Acid (Amino)                  |
| DL-isoleucine 1                | 0,580          | Acid (Amino)                  |
| DL-isoleucine 2                | 0,345          | Acid (Amino)                  |
| gamma-aminobutyric acid (GABA) | 0,344          | Acid (Amino)                  |
| glycine                        | 0,550          | Acid (Amino)                  |
| L-alanine 2                    | 0,553          | Acid (Amino)                  |
| L-allothreonine 2              | 0,047          | Acid (Amino)                  |
| L-asparagine 2                 | 0,115          | Acid (Amino)                  |
| L-glutamic acid 2              | 0,066          | Acid (Amino)                  |
| L-glutamic acid 3 (dehydrated) | 0,602          | Acid (Amino)                  |
| L-glutamine 1                  | 0,941          | Acid (Amino)                  |
| L-glutamine 2                  | 0,224          | Acid (Amino)                  |
| L-glutamine 3                  | 0,106          | Acid (Amino)                  |
| L-leucine 2                    | 0,547          | Acid (Amino)                  |
| L-lysine 2                     | 0,372          | Acid (Amino)                  |
| L-ornithine 2                  | 0,178          | Acid (Amino)                  |
| L-proline 2                    | 0,283          | Acid (Amino)                  |
| L-serine 1                     | 0,096          | Acid (Amino)                  |
| L-serine 2                     | 0,066          | Acid (Amino)                  |
| L-threonine 1                  | 0,415          | Acid (Amino)                  |
| L-threonine 2                  | 0,232          | Acid (Amino)                  |
| L-tryptophan 2                 | 0,497          | Acid (Amino)                  |
| L-valine 2                     | 0,047          | Acid (Amino)                  |
| norvaline 1 (pmm)              | 0,973          | Acid (Amino)                  |
| Phenylalanine 1                | 0,162          | Acid (Amino)                  |
| Phenylalanine 1                | 0,124          | Acid (Amino)                  |
| tyrosine 2                     | 0,319          | Acid (Amino)                  |
| citrulline 2                   | 0,200          | Acid (Amino), non proteinogen |
| acetyl-L-serine 1              | 0,153          | Acid (Amino, N-acyl-)         |

| Metabolites           | <i>p</i> value | Class                                  |
|-----------------------|----------------|----------------------------------------|
| 4-hydroxybenzoic acid | 0,634          | Acid (Aromatic)                        |
| benzoic acid (pmm)    | 0,027          | Acid (Aromatic)                        |
| mandelic acid         | 0,552          | Acid (Aromatic)                        |
| salicylic acid        | 0,955          | Acid (Aromatic)                        |
| glycolic acid (sl)    | 0,931          | Acid (carboxy)                         |
| glyoxylic acid        | 0,736          | Acid (carboxy)                         |
| adipic acid           | 0,222          | Acid (Dicarboxylic)                    |
| azelaic acid          | 0,352          | Acid (Dicarboxylic)                    |
| citraconic acid 1     | 0,008          | Acid (Dicarboxylic)                    |
| citraconic acid 3     | 0,857          | Acid (Dicarboxylic)                    |
| citraconic acid 5     | 0,763          | Acid (Dicarboxylic)                    |
| fumaric acid          | 0,039          | Acid (Dicarboxylic)                    |
| glutaconic acid 1     | 0,158          | Acid (dicarboxylic)                    |
| glutaric acid (pmm)   | 0,662          | Acid (Dicarboxylic)                    |
| itaconic acid         | 0,114          | Acid (Dicarboxylic)                    |
| maleic acid           | 0,556          | Acid (Dicarboxylic)                    |
| malonic acid 1        | 0,143          | Acid (Dicarboxylic)                    |
| oxalic acid           | 0,668          | Acid (Dicarboxylic)                    |
| succinic acid         | 0,548          | Acid (Dicarboxylic)                    |
| arachidic acid        | 0,779          | Acid (Fatty acid trimethylsilyl ester) |
| capric acid           | 0,698          | Acid (Fatty acid trimethylsilyl ester) |
| elaidic acid          | 0,787          | Acid (Fatty acid trimethylsilyl ester) |
| lauric acid           | 0,505          | Acid (Fatty acid trimethylsilyl ester) |

| Metabolites                       | p value | Class                                  |
|-----------------------------------|---------|----------------------------------------|
| linoleic acid                     | 0,711   | Acid (Fatty acid trimethylsilyl ester) |
| myristic acid                     | 0,253   | Acid (Fatty acid trimethylsilyl ester) |
| Myristic Acid d27                 | 0,387   | Acid (Fatty acid trimethylsilyl ester) |
| oleic acid                        | 0,956   | Acid (Fatty acid trimethylsilyl ester) |
| palmitic acid                     | 0,609   | Acid (Fatty acid trimethylsilyl ester) |
| palmitoleic acid                  | 0,544   | Acid (Fatty acid trimethylsilyl ester) |
| stearic acid                      | 0,569   | Acid (Fatty acid trimethylsilyl ester) |
| hexanoic acid (sl)                | 0,277   | Acid (Fatty acid)                      |
| D-saccharic acid                  | 0,625   | Acid (Hexaric)                         |
| galactonic acid 2                 | 0,717   | Acid (Hexonic)                         |
| gluconic acid 2                   | 0,669   | Acid (Hexonic)                         |
| gluconic acid lactone 1           | 0,249   | Acid (Hexonic, lactone)                |
| galacturonic acid 1               | 0,302   | Acid (Hexuronic)                       |
| citramalic acid                   | 0,460   | Acid (hydroxy ducarboxy)               |
| dehydroascorbic acid 1            | 0,525   | Acid (Hydroxy)                         |
| dehydroascorbic acid 4            | 0,728   | Acid (Hydroxy)                         |
| D-malic acid                      | 0,795   | Acid (Hydroxy)                         |
| glyceric acid                     | 0,731   | Acid (Hydroxy)                         |
| L-(+) lactic acid (sl)            | 0,562   | Acid (Hydroxy)                         |
| L-ascorbic acid                   | 0,162   | Acid (Hydroxy)                         |
| pantothenic acid 2                | 0,784   | Acid (Hydroxy)                         |
| quinic acid                       | 0,195   | Acid (Hydroxy)                         |
| shikimic acid                     | 0,744   | Acid (Hydroxy)                         |
| tagatose 1                        | 0,051   | Acid (Hydroxy)                         |
| threonic acid                     | 0,535   | Acid (Hydroxy)                         |
| erythrono-1,4-lactone             | 0,915   | Acid (Hydroxy, lactone)                |
| alpha ketoglutaric acid           | 0,114   | acid (Keto)                            |
| nicotinic acid                    | 0,308   | Acid (N-heterocycle)                   |
| B28pyruvic acid (sl)              | 0,940   | Acid (Oxo)                             |
| 3,5-dimethoxy-4-hydroxycinnamique | 0,322   | Acid (Phenylpropanoic)                 |

| Metabolites                    | p value | Class                         |
|--------------------------------|---------|-------------------------------|
| cinnamic acid                  | 0,847   | Acid (Phenylpropanoic)        |
| ferulic acid                   | 0,943   | Acid (Phenylpropanoic)        |
| phosphoric acid                | 0,059   | Acid (Phosphate)              |
| citric acid                    | 0,421   | Acid (Tricarboxylic)          |
| isocitric acid                 | 0,343   | Acid (Tricarboxylic)          |
| trans-aconitic acid            | 0,282   | Acid (Tricarboxylic)          |
| 1-decanol (decyl alcohol)      | 0,114   | alcohol                       |
| 1-nonanol                      | 0,490   | alcohol                       |
| ethanolamine                   | 0,741   | Alcohol (Amino)               |
| triethanolamine                | 0,560   | Alcohol (Amino)               |
| phytol 2                       | 0,041   | Alcohol (Isoprenoid)          |
| beta-glycerolphosphate         | 0,540   | Alcohol (Phosphate)           |
| glycerol 1-phosphate           | 0,305   | Alcohol (Phosphate)           |
| urea                           | 0,093   | Amide                         |
| allantoin 1                    | 0,100   | Amide (N-heterocycle)         |
| allantoin 3                    | 0,078   | Amide (N-heterocycle)         |
| putrescine                     | 0,891   | Amine (Poly)                  |
| galactinol 2                   | 0,656   | Conjugate (Hexosyl, Inositol) |
| galactitol                     | 0,910   | Conjugate (Hexosyl, Inositol) |
| 2,3-butanediol 2               | 0,157   | misc                          |
| 2-hydroxypyridine              | 0,942   | misc                          |
| 3-(methylthio)-propylamine     | 0,449   | misc                          |
| 3-indoleacetoneitrile          | 0,225   | misc                          |
| 4-hydroxypyridine              | 0,369   | misc                          |
| acetohydroxamic acid           | 0,930   | misc                          |
| benzothiazole                  | 0,496   | misc                          |
| cyclohexanamine                | 0,890   | misc                          |
| cysteinylglycine 1             | 0,040   | misc                          |
| homovanillic acid (HVA)        | 0,839   | misc                          |
| isopropyl beta-D-1-thiogalacto | 0,728   | misc                          |
| loganin                        | 0,357   | misc                          |
| neohesperidin                  | 0,222   | misc                          |
| N-ethylglycine 2               | 0,824   | misc                          |
| N-methylalanine                | 0,317   | misc                          |

| Metabolites              | p value | Class                             |
|--------------------------|---------|-----------------------------------|
| O-phosphocolamine        | 0,158   | misc                              |
| porphine 1               | 0,736   | misc                              |
| tyramine                 | 0,691   | misc                              |
| adenosine 5'-diphosphate | 0,589   | Nucleoside                        |
| D-sorbitol               | 0,539   | Polyol (Hexitol)                  |
| myo-inositol             | 0,171   | Polyol (Inositol)                 |
| glycerol                 | 0,444   | Polyol (Triol)                    |
| adenine 1                | 0,357   | Purine                            |
| uric acid 1              | 0,711   | Purine                            |
| 9H-purine-6-amine        | 0,133   | purine (cytokinine)               |
| beta-gentiobiose 2       | 0,481   | Sugar (Disaccharide)              |
| lactose 1                | 0,461   | Sugar (Disaccharide)              |
| leucrose                 | 0,386   | Sugar (Disaccharide)              |
| maltose 2                | 0,716   | Sugar (Disaccharide)              |
| melibiose 1              | 0,846   | Sugar (Disaccharide)              |
| Sucrose                  | 0,995   | Sugar (Disaccharide)              |
| fructose 1               | 0,071   | Sugar (Hexose)                    |
| fructose 2               | 0,009   | Sugar (Hexose)                    |
| D (+)altrose 1           | 0,336   | Sugar (Hexose, aldose)            |
| D-(+) trehalose          | 0,073   | Sugar (Hexose, aldose)            |
| D-glucose 1              | 0,200   | Sugar (Hexose, aldose)            |
| D-glucose 2              | 0,325   | Sugar (Hexose, aldose)            |
| D-mannose 1              | 0,383   | Sugar (Hexose, aldose)            |
| Glucopyranose            | 0,285   | Sugar (Hexose, aldose)            |
| 1,5-anhydro-D-sorbitol   | 0,303   | Sugar (Hexose, aldose, anhydride) |
| 1,6-anhydro-glucose      | 0,435   | Sugar (Hexose, aldose, anhydride) |
| rhamnose 1               | 0,339   | Sugar (Hexose, deoxy)             |
| rhamnose 2               | 0,330   | Sugar (Hexose, deoxy)             |
| arabinose                | 0,639   | Sugar (Pentose, aldose)           |
| ribose                   | 0,524   | Sugar (Pentose, aldose)           |

| Metabolites               | p value | Class                   |
|---------------------------|---------|-------------------------|
| xylose 2                  | 0,591   | Sugar (Pentose, aldose) |
| xylulose                  | 0,773   | Sugar (Pentose, ketose) |
| D-glucose-6-phosphate 1   | 0,126   | Sugar (Phosphate)       |
| D-glucose-6-phosphate 2   | 0,040   | Sugar (Phosphate)       |
| fructose 6-phosphate      | 0,104   | Sugar (Phosphate)       |
| sedoheptulose 7-phosphate | 0,221   | Sugar (Phosphate)       |
| Raffinose (pmm)           | 0,931   | Sugar (Trisaccharide)   |
| beta-sitosterol           | 0,212   | Terpenoid (Sterols)     |
| cholesterol               | 0,816   | Terpenoid (Sterols)     |

**Supplemental Table S4. Primers used for characterizing mutant lines.**

| Accession number | Primer name                        | Sequence (5'→3')                          | Amplicon size (bp) | Purpose                   |
|------------------|------------------------------------|-------------------------------------------|--------------------|---------------------------|
| At3g16690        | sweet16-3_LP                       | TGCAACTATGGAAATGGAAGG                     | 1655               | Genotyping                |
|                  | sweet16-3_RP                       | GATTCAGCAAGAGCACCAAAG                     |                    |                           |
|                  | sweet16-4_LP                       | TGCAAATAATTTAGCAACCGC                     | 1742               |                           |
|                  | sweet16-4_RP                       | TATAAATGATCTGGGGCCATC                     |                    |                           |
|                  | SWEET16CDS<br>+stopF               | ATGGCAGACTTGAGTTTTTATGTC                  | 693                | Full-length<br>PCR        |
|                  | SWEET16CDS<br>+stopR               | TTAAGCGAGGAGAGGTTGATTT                    |                    |                           |
|                  | SWEET16CDS<br>+stopF               | ATGGCAGACTTGAGTTTTTATGTC                  | 693                | BIFC<br>experiment        |
|                  | SWEET16CDS<br>+stopR               | TTAAGCGAGGAGAGGTTGATTT                    |                    |                           |
|                  | SWEET16CDS-<br>stopR               | AGCGAGGAGAGGTTGATTT                       | 690                |                           |
|                  | Bam-pS16-5'                        | CGGGATCCTGATTACAACATTACAACATTCAGTG        | 1295               | GFP<br>fusions<br>cloning |
|                  | EcoI-pS16-3'                       | CGGAATTCCTCTGAGGATGGGTTTCTGAG             |                    |                           |
|                  | Not-S16-5'                         | ATAAGAATGCGGCCGCATGGCAGACTTGAGTTTTTATG    | 1863               |                           |
|                  | Eco5-S16-3'                        | ATAAGAATGCGGCCGCCATGGCAGACTTGAGTTTTTATGT  |                    |                           |
| At4g15920        | sweet17-1_LP                       | TGATGTGAGGCCTTCTCCTT                      | 771                | Genotyping                |
|                  | sweet17-1_RP                       | CCGTTTTGGTTGTCGTTTTT                      |                    |                           |
|                  | SWEET17CDS<br>+stopF               | ATGGCAGAGGCAAGTTTCTATATC                  | 726                | Full-length<br>PCR        |
|                  | SWEET17CDS<br>+stopR               | TTAAGAGAGGAGAGGTTCAACACG                  |                    |                           |
|                  | SWEET17CDS<br>+stopF               | ATGGCAGAGGCAAGTTTCTATATC                  | 726                | BIFC<br>experiment        |
|                  | SWEET17CDS<br>+stopR               | TTAAGAGAGGAGAGGTTCAACACG                  |                    |                           |
|                  | SWEET17CDS-<br>stopR               | AGAGAGGAGAGGTTCAACACG                     | 723                |                           |
|                  | Sal-pS17-5'                        | ACGCGTCGACAAAGAGATAAAATTAATGAGATTTGTATGG  | 2004               | GFP<br>fusions<br>cloning |
|                  | Kpn-pS17-3'                        | GGGGTACCTATTGGAGAAAGAGTTTCTGAG            |                    |                           |
|                  | Not-S17-5'                         | ATAAGAATGCGGCCGCCATGGCAGAGGCAAGTTTCTATATC | 2601               |                           |
| Eco5-S17-3'      | CCCGGATATCTTAAGAGAGGAGAGGTTCAACACG |                                           |                    |                           |
| eGFP             | EcoI-eGFP5'                        | CGGAATTCATGGTGAGCAAGGGCGAGGA              | 714                | Cloning                   |
|                  | Not-eGFP-<br>3'0stop               | ATAAGAATGCGGCCGCTTGTACAGCTCGTCCATGCC      |                    |                           |

**Supplemental Table S5. Primers used for quantifying genes by RT-qPCR.**

| Accession number | Gene name             | Forward sequence (5'→3')   | Reverse sequence (5'→3')           | Size (bp) | Efficiency | Reference                  |
|------------------|-----------------------|----------------------------|------------------------------------|-----------|------------|----------------------------|
| At5g12870        | <i>MYB46</i>          | GAATGTGAAGAAGGTGATTGGTACA  | CGAAGGAACCTCAGTGTTCATCA            | 150       | 73.5       | (Takeuchi et al., 2018)    |
| At3g08500        | <i>MYB83</i>          | GTCGCCTTCGCTGGATCAAT       | AAGCCGCTTCTCAATGTCG                | 191       | 85.8       | (Shafi et al., 2019)       |
| At5g61480        | <i>PXY</i>            | TTCAAACCGACGAATCCATGT      | TTATCCACTTGTAAGTGTAAAGCATATT<br>CT | 85        | 95.4       | (Smetana et al., 2019)     |
| At1g46480        | <i>WOX4</i>           | GACAAGAACATCATCGTCACTAGACA | TTCTCCACCATTGGTCTCTCA              | 51        | 92.4       | (Smetana et al., 2019)     |
| At1g32770        | <i>SND1/<br/>NST3</i> | GCAGCAACTGGGCTAGTCTT       | CCCATCGTGCATCATAGTA                | 126       | 93.6       | This study                 |
| At4g32880        | <i>AtHB8</i>          | AACACCCTTGACCCCTCAACATCAG  | CACGCAACCAACAAGGCTTATCC            | 276       | 91.9       | (Carlsbecker et al., 2010) |
| At5g44030        | <i>CESA4</i>          | TGCCTATGGATCGGAAAAATGGA    | ACGTTCTTCCACTCCGCAT                | 145       | 95.4       | (Shafi et al., 2019)       |
| At5g17420        | <i>CESA7</i>          | TTGTGTACGTGTCCCGTGAG       | ATTTGTGAGTACGCCTGCCA               | 98        | 101.1      | (Shafi et al., 2019)       |
| At4g18780        | <i>CESA8</i>          | AGGTCTCCCATCTGCAACAC       | CTCATCGTAAGGATTGCCGC               | 168       | 97.9       | (Shafi et al., 2019)       |
| At1g28470        | <i>SND3</i>           | TTCTTCCACCGCCATCAAA        | CTGGCGACCATAGTTGGTGT               | 183       | 103.8      | (Shafi et al., 2019)       |
| At1g63910        | <i>MYB103</i>         | GGGAAACAGGTGGGCTCATA       | TGGTAGAGGCCCTCGATGGTA              | 197       | 100.3      | (Shafi et al., 2019)       |
| At1g62990        | <i>KNAT7</i>          | GAAGCTGTTATGGCTTGCCG       | TCGGTAGCAACGACCAAAAT               | 190       | 95.3       | (Shafi et al., 2019)       |
| At1g79180        | <i>MYB63</i>          | GACAAACCGATCTGCTGGA        | CCCGAGTTCGCTTTCTAGGT               | 189       | 99.8       | (Shafi et al., 2019)       |
| At1g16490        | <i>MYB58</i>          | AAGCGGGTTCAAAGGTTCT        | GCATCATCGTCTTTGCTTGA               | 109       | 98         | This study                 |
| At5g13180        | <i>VNI2</i>           | CTCCTTGGCCAGCTCAATC        | GGTTAGACCGTTCCCATTT                | 138       | 97.8       | This study                 |
| At5g64530        | <i>XND1</i>           | CCCGACCTTGATCTTTACCA       | CCCAATACCCATTGCTTGTC               | 124       | 94.9       | This study                 |
| At4g39620        | <i>MYB4</i>           | ACAGAGGGATTGATCCAACG       | TCGACCTTGGAGCAGAAGT                | 133       | 97.9       | This study                 |
| At1g17950        | <i>MYB52</i>          | CCGGTCGAACTGATAACGCT       | ACCAATCATCCCAAGTCGACG              | 131       | 103        | (Shafi et al., 2019)       |
| At1g73410        | <i>MYB54</i>          | AACCGAAACCTTTCACGGA        | ACGAGGCTTAGAGGTTTGGC               | 174       | 87.8       | (Shafi et al., 2019)       |
| At5g16600        | <i>MYB43</i>          | CCATGCGCAACTTGCCAATA       | CCCTTGAGCTTGTGTGAAGC               | 178       | 100.1      | (Shafi et al., 2019)       |
| At3g62250        | <i>UBQ5</i>           | CCAAGCCGAAGAAGATCAAG       | ACTCCTTCTCAAACGCTGA                | 105       | 98.6       | This study                 |

## SUPPLEMENTAL REFERENCES

- Carlsbecker A, Lee JY, Roberts CJ, Dettmer J, Lehesranta S, Zhou J, Lindgren O, Moreno-Risueno MA, Vatén A, Thitamadee S, et al** (2010) Cell signalling by microRNA165/6 directs gene dose-dependent root cell fate. *Nature* **465**: 316–321
- Li Z, Omranian N, Neumetzler L, Wang T, Herter T, Usadel B, Demura T, Giavalisco P, Nikoloski Z, Persson S** (2016) A Transcriptional and Metabolic Framework for Secondary Wall Formation in Arabidopsis. *Plant Physiol* **172**: 1334–1351
- Shafi A, Gill T, Zahoor I, Ahuja PS, Sreenivasulu Y, Kumar S, Singh AK** (2019) Ectopic expression of SOD and APX genes in Arabidopsis alters metabolic pools and genes related to secondary cell wall cellulose biosynthesis and improve salt tolerance. *Mol Biol Rep* **46**: 1985–2002
- Smetana O, Mäkilä R, Lyu M, Amiryousefi A, Rodríguez FS, Wu M, Solé-gil A, Gavarrón ML, Siligato R, Miyashima S, et al** (2019) High levels of auxin signalling define the stem-cell organizer of the vascular cambium. *Nature* **565**: 485–491
- Takeuchi M, Watanabe A, Tamura M, Tsutsumi Y** (2018) The gene expression analysis of Arabidopsis thaliana ABC transporters by real-time PCR for screening monolignol-transporter candidates. *J Wood Sci* **64**: 477–484
